# Supplementary material for: Identification of Gene Biomarkers for Distinguishing Small-Cell Lung Cancer from Non-Small-Cell Lung Cancer Using a Network-Based Approach
Source: Biomed Res Int. 2015 Jul 28;2015:685303. doi: 10.1155/2015/685303 (PMC4531169; doi:10.1155/2015/685303)
Supplement: Supplementary file 1 — The detailed information about the differentially expressed gene modules in lung cancer as well as their functional analysis. [file 685303.f1.xlsx]

## Sheet: TableS1
Type	ModuleID	Genes	Functions
SCLC_down	M375	NOV,IGFBP7,SPARC,PDGFA,CTGF,SPRY1,SPOCK2
SCLC_down	M191	GPR4,EDNRA,LMO7,EDNRB,EDN1,F2RL3,GRK5	BIOCARTA_CARDIACEGF_PATHWAY_0.0007005585 GO:0014829:vascular smooth muscle contraction_0.0003475587 REACTOME_G_ALPHA_Q_SIGNALLING_EVENTS_0.0002399729 GO:0007186:G-protein coupled receptor signaling pathway_0.0280834082
SCLC_down	M346	LMO2,SPARCL1,PTPRB,GPR116,CDH5,EMCN
SCLC_down	M208	RPH3AL,STXBP1,PLD1,UNC13B	REACTOME_GLUTAMATE_NEUROTRANSMITTER_RELEASE_CYCLE_0.07095404
SCLC_down	M277	ERGIC3,PRKCSH
SCLC_down	M190	ADRB1,CALCRL,RAMP3	REACTOME_G_ALPHA_S_SIGNALLING_EVENTS_0.07692535
SCLC_down	M374	SERPING1,ADAMTS1,MMRN1,CTSE,TGFB3,A2M,GAS6,VASH1	GO:0016023:cytoplasmic membrane-bounded vesicle_1.286525e-02 REACTOME_INTRINSIC_PATHWAY_0.088505403 REACTOME_RESPONSE_TO_ELEVATED_PLATELET_CYTOSOLIC_CA2__0.008796102 GO:0032940:secretion by cell_0.0097689932 GO:2000258:negative regulation of protein activation cascade_0.0177463815 GO:0007597:blood coagulation, intrinsic pathway_0.0511711521 GO:0031410:cytoplasmic vesicle_1.790080e-02 GO:0031093:p…
SCLC_down	M413	PTPN22,STAB1,VSIG4,TNFAIP8L2,GIMAP4,MS4A7,SLC11A1,FCGR2B,GPR171,CSF1,HCST,C1QA,SIRPG,CYP27A1,ACP5,RNASE1,MPEG1,SLCO2B1,CAPG,PLA2G7,SLAMF8,TREM1,CD163,GIMAP2,ALOX5AP,HLA-DPB1,GIMAP5,TBXAS1,C1QB,GBP5,GPR34,CD300C,DPEP2,AMICA1,PLXDC2,FCN1,FCGR2A,FOLR2,EMILIN2,LILRB2,NCF2,C1orf162,TLR2,C1QC,LILRB3,TMEM176B,HLA-DQB1,TYROBP,HLA-DRA,HLA-DMA,HLA-DQB2,CLEC4A,GIMAP6,OSCAR,LIPA,COTL1,GPSM3,SLC15A3,HLA-DPA1,…	GO:0002577:regulation of antigen processing and presentation_0.0561999958 GO:0032944:regulation of mononuclear cell proliferation_0.0030837751 GO:0060333:interferon-gamma-mediated signaling pathway_0.0396444737 GO:0044459:plasma membrane part_2.762912e-02 GO:0098552:_2.727407e-03 KEGG_ASTHMA_7.757043e-11 GO:0005765:lysosomal membrane_4.276317e-03 GO:0031410:cytoplasmic vesicle_6.391614e-02 GO:000…
SCLC_down	M348	C1orf54,CLEC14A,COX7A1,CLDN5,HIGD1B,AQP1,CLEC3B
SCLC_down	M668	SLC4A2,SLC26A6
SCLC_down	M491	PAFAH2,LTA4H,ALOX15B,PLA2G1B,PLA2G10,STS,HSD17B6	GO:0006706:steroid catabolic process_0.038577973 GO:0010744:positive regulation of macrophage derived foam cell differentiation_0.035250206 GO:0006629:lipid metabolic process_0.013556699 KEGG_ARACHIDONIC_ACID_METABOLISM_0.001174361 GO:0051047:positive regulation of secretion_0.069911309 GO:0006631:fatty acid metabolic process_0.013556699 GO:0010743:regulation of macrophage derived foam cell diffe…
SCLC_down	M342	CPA3,HDC
SCLC_down	M176	CAPN3,SNTB1,SGCA,SPATA18,PGM5,DYSF	GO:0030018:Z disc_0.0875392820 GO:0042383:sarcolemma_0.0007513670 GO:0016010:dystrophin-associated glycoprotein complex_0.0001893996
SCLC_down	M351	TPM1,TPM4,MYH10,SORBS1,LAMA2,CALD1,ACTA2,ACTG2,LPP,SSPN,TAGLN,MYL9,MYH11,KCNMB1,CSRP1,GLT8D2,CNN1,SGCD,SMTN,MYLK	GO:0015629:actin cytoskeleton_0.0002212799 GO:0032155:cell division site part_0.0462093825 KEGG_VIRAL_MYOCARDITIS_1.805293e-02 REACTOME_SEMA4D_INDUCED_CELL_MIGRATION_AND_GROWTH_CONE_COLLAPSE_1.805293e-02 KEGG_HYPERTROPHIC_CARDIOMYOPATHY_HCM_2.055215e-02 GO:0016460:myosin II complex_0.0462093825 GO:0032153:cell division site_0.0462093825 REACTOME_SMOOTH_MUSCLE_CONTRACTION_1.656800e-12 GO:0097610:_…
SCLC_down	M478	CP,LTF,SLPI
SCLC_down	M416	IL27RA,STAT4,IL32,IL33,IL18RAP,IL18R1,EBI3
SCLC_down	M382	ELN,DCN,FBLN2,MFAP4,ARSB	GO:0031012:extracellular matrix_0.09924644 GO:0030198:extracellular matrix organization_0.09054096 GO:0030207:chondroitin sulfate catabolic process_0.09054096 REACTOME_CS_DS_DEGRADATION_0.06650107
SCLC_down	M347	GJA4,ESAM,F12,VWF	REACTOME_INTRINSIC_PATHWAY_0.08910833
SCLC_down	M445	NR4A3,GADD45B,JUN,NR4A2,EGR1,FOS,EGR2,BTG2,RGS2,TSC22D3,KLF6,JUNB,PPP1R15A,TTLL5,CYR61,MAFF,ZFP36,DUSP1	BIOCARTA_ARENRF2_PATHWAY_0.009685073
SCLC_down	M465	SCGB2A1,SCGB3A1,ABCA3,SFTPD,CCDC59,KRT7,SCGB1A1,SFTPC
SCLC_up~NSCLC_up	M338	GNB1L,ZDHHC8
SCLC_up~NSCLC_up	M46	ITPR3,GNB4
SCLC_up~NSCLC_up	M512	HCN3,MRPL49,COLQ
SCLC_up~NSCLC_up	M359	SPRR1B,KRT15,SPRR1A	GO:0001533:cornified envelope_0.0185278 GO:0018149:peptide cross-linking_0.07769605 GO:0008544:epidermis development_0.07769605
SCLC_up~NSCLC_up	M319	LSM4,SNRPF,WDR77,LSM7	GO:0030532:small nuclear ribonucleoprotein_0.05079273 GO:0034709:methylosome_0.01074432
SCLC_up~NSCLC_up	M171	DERA,ALDOC,EGLN3,GPI,ENO2,PFKP,CSTB,NPEPL1,ALDOA,ZNF629,PGAM1,USP5,ENO1,LDHA,TPI1	GO:0006000:fructose metabolic process_2.475200e-02 GO:0044723:single-organism carbohydrate metabolic process_2.297789e-03 REACTOME_GLYCOLYSIS_5.277223e-11 REACTOME_METABOLISM_OF_CARBOHYDRATES_4.334091e-05 GO:0032787:monocarboxylic acid metabolic process_6.829547e-05 KEGG_PENTOSE_PHOSPHATE_PATHWAY_2.554166e-06 GO:0006096:glycolysis_2.540150e-09 GO:0044712:single-organism catabolic process_3.238369…
SCLC_up~NSCLC_up	M130	SCG5,CPE,CHGB
SCLC_up~NSCLC_up	M101	GOLGA3,COG2	GO:0017119:Golgi transport complex_0.003587763 GO:0006891:intra-Golgi vesicle-mediated transport_0.09903281
NSCLC_up	M62	OSBPL1A,PVR,DYNLT1,DYNC1LI2,DYNLRB1	GO:0030286:dynein complex_0.0261848
NSCLC_up	M193	TCF4,SSTR2
NSCLC_up	M483	ALDH3B2,ALDH7A1	KEGG_HISTIDINE_METABOLISM_0.09676096
NSCLC_up	M368	DUSP19,MAPKBP1,MAPK9,ELK1	GO:0031098:stress-activated protein kinase signaling cascade_0.06503954
NSCLC_up	M50	CREB3L2,EIF2B5,EIF2B2,TMEM132A,EIF2B4,EIF2AK4,PARD6A,NIN,GSK3B	GO:0043547:positive regulation of GTPase activity_0.0313184565 GO:0007417:central nervous system development_0.0632069721 GO:0009408:response to heat_0.0026102515 BIOCARTA_VEGF_PATHWAY_0.007057730 GO:0034976:response to endoplasmic reticulum stress_0.0408821662 GO:0005851:eukaryotic translation initiation factor 2B complex_3.420176e-05 GO:0014003:oligodendrocyte development_0.0009618478 GO:000641…
NSCLC_up	M558	PUS3,RPUSD4
NSCLC_up	M715	ZMYM1,ANGEL2
NSCLC_up	M456	RAI1,SKIV2L,STK19
NSCLC_up	M285	PURB,FAM120A,PURA	GO:0005657:replication fork_0.015135677 GO:0032993:protein-DNA complex_0.028450672 GO:0043596:nuclear replication fork_0.007463397 GO:0005662:DNA replication factor A complex_0.003045202 GO:0030894:replisome_0.006175935 GO:0043601:nuclear replisome_0.006175935
NSCLC_up	M339	PSEN2,BLZF1,ACBD3,BPNT1
SCLC_up	M634	B4GALT2,FUT6	KEGG_GLYCOSPHINGOLIPID_BIOSYNTHESIS_LACTO_AND_NEOLACTO_SERIES_0.07875739
SCLC_up	M549	ZNF664,CCDC9
SCLC_up	M693	SLC25A21,MIPOL1
SCLC_up	M249	HIST1H4E,HIST1H2BN,HIST1H2AE,HIST1H2BI,HIST1H2BG,HIST1H2BD,HIST1H3H,HIST1H2BO,HIST1H2BE,HIST1H1C,HIST1H2BJ,HIST1H2BF,HIST2H2BE,HIST1H2AC,HIST1H2BM,HIST1H2AM	GO:0034622:cellular macromolecular complex assembly_1.491230e-02 GO:0006334:nucleosome assembly_1.097051e-05 GO:0000785:chromatin_5.271330e-05 GO:0002227:innate immune response in mucosa_2.276149e-03 REACTOME_CELL_CYCLE_4.575030e-08 REACTOME_RNA_POL_I_PROMOTER_OPENING_2.204832e-18 GO:1990104:DNA bending complex_1.720509e-09 GO:0006325:chromatin organization_4.131548e-03 GO:0032993:protein-DNA com…
SCLC_up	M590	GRIN2C,CAMK2B	REACTOME_CREB_PHOSPHORYLATION_THROUGH_THE_ACTIVATION_OF_CAMKII_0.01192155
SCLC_up	M606	ASTE1,NRCAM
SCLC_up	M247	HIST1H1D,GATAD2B,HIST1H2AK,HIST1H1E,KPNA3,HIST1H3F,HIST1H3G,CBX5,HIST1H1B,HIST1H3B,HIST1H4H,HIST1H3C,MBD1,HIST1H3J,IGBP1	REACTOME_APOPTOSIS_INDUCED_DNA_FRAGMENTATION_6.634539e-04 REACTOME_FACTORS_INVOLVED_IN_MEGAKARYOCYTE_DEVELOPMENT_AND_PLATELET_PRODUCTION_1.413411e-04 REACTOME_RNA_POL_I_PROMOTER_OPENING_1.700074e-05 GO:0005720:nuclear heterochromatin_0.002239780 GO:0000790:nuclear chromatin_0.002239780
SCLC_up	M517	TSEN54,TSEN34
SCLC_up	M337	ANP32A,PTMS,PTMA,KPNA6
SCLC_up	M594	ZNF92,ZNF85,ZNF91,ZNF675,ZNF493,ZNF117,ZNF254,ZNF430
SCLC_up	M47	CACNA1A,ABCC8
SCLC_up	M670	INA,NEFH
SCLC_up	M87	SMARCAL1,MBD6,TLE1,FOXB1,EVX1,CASKIN1,RHBDL1,GALR3,MARK3,ADRBK1,EN2,TPSG1,CDC42EP5,CRTC1,POLL,RPAIN,ZNF579,MMP17,PARP10,LSM14B,LBX1,FBXW4,ARRB2,KIAA1429,UTS2R
SCLC_up	M505	C14orf2,ATP5I,NDUFA5,UBL5,COX6B2,MRPS33,PARK7,PHF14,COX5B,COX7B,TBCA,NDUFB3,NDUFAF1,NDUFS4,NDUFB1,MRPL33,C20orf24,UQCRB,COX6B1,COX7A2,MRPS18C,NDUFB6,NDUFA4,NDUFAB1,NDUFB2,COX7C,COX6C,HINT1,HSD17B8,NDUFB11,NDUFA12,NDUFC1	GO:0022900:other pathways of electron transport_1.705002e-21 GO:0005739:mitochondrion_3.863681e-12 GO:0005763:mitochondrial small ribosomal subunit_4.745774e-02 GO:0000314:organellar small ribosomal subunit_4.745774e-02 GO:0031966:mitochondrial membrane_6.017460e-17 GO:0031090:organelle membrane_2.267553e-05 GO:0016310:phosphorylation_2.443541e-03 REACTOME_RESPIRATORY_ELECTRON_TRANSPORT_4.085779e…
SCLC_up	M562	HDGFL1,C7orf26
NSCLC_down	M345	MMRN2,ROBO4,DLX5,EGFL7,MEF2C	GO:0001958:endochondral ossification_0.03653009 GO:0060350:endochondral bone morphogenesis_0.08090241
NSCLC_down	M75	LMAN1,EEA1
NSCLC_down	M440	HMOX1,SOD2,FTL
NSCLC_down	M407	BICD2,NEK9,NEK7
NSCLC_down	M114	CKB,BLOC1S2,TRAF3IP1
NSCLC_down	M163	CYP51A1,LBR,IDI1,NFYC	REACTOME_CHOLESTEROL_BIOSYNTHESIS_0.001350439 GO:0016126:sterol biosynthetic process_0.001672576
NSCLC_down	M143	ATRX,ZNF644,PFDN6,VBP1,PFDN1,SCML1,PIR,MOSPD1,RBM3	REACTOME_PREFOLDIN_MEDIATED_TRANSFER_OF_SUBSTRATE_TO_CCT_TRIC_0.01280798 GO:0006458:'de novo' protein folding_0.0347133
NSCLC_down	M484	GSTA4,MGST1,MGST3	GO:0044272:sulfur compound biosynthetic process_0.0437120021 REACTOME_GLUTATHIONE_CONJUGATION_0.0006882335 GO:1901685:glutathione derivative metabolic process_0.0009577172
NSCLC_down	M452	TAGLN2,FLNA,OSBPL3,PLXND1,HSPB8,RRAS,SIX3
NSCLC_down	M239	HEYL,MAML3,NOTCH2,MAML1,RBPJ	GO:0003203:endocardial cushion morphogenesis_0.036846364 REACTOME_NOTCH_HLH_TRANSCRIPTION_PATHWAY_2.028273e-06 REACTOME_GENERIC_TRANSCRIPTION_PATHWAY_5.004226e-02 GO:0003198:epithelial to mesenchymal transition involved in endocardial cushion formation_0.028426101 GO:0007219:Notch signaling pathway_0.003335578
SCLC_down~NSCLC_down	M441	F3,CXCL1
SCLC_down~NSCLC_down	M554	ABI3BP,ABR,ABI3,EPS8,ABLIM1
SCLC_down~NSCLC_down	M630	ZNF23,ZFP36L2
SCLC_down~NSCLC_down	M435	LILRB4,HSD11B1
SCLC_down~NSCLC_down	M599	PF4,ITGA2B
SCLC_down~NSCLC_down	M488	CYP2U1,FMO2,MAOB,INMT,ALDH3B1,MAOA,AOC3	KEGG_TRYPTOPHAN_METABOLISM_2.722426e-03 KEGG_PHENYLALANINE_METABOLISM_1.616811e-05 GO:0071466:cellular response to xenobiotic stimulus_0.01848532 KEGG_DRUG_METABOLISM_CYTOCHROME_P450_6.638542e-04 KEGG_GLYCINE_SERINE_AND_THREONINE_METABOLISM_1.554657e-03
SCLC_down~NSCLC_down	M516	CD302,FNDC3A
SCLC_down~NSCLC_down	M604	GPR108,GPR157

## Sheet: TableS2
Original datasets			With new NSCLC datasets
Gene	Score		Gene	Score		overlap
ACBD3	-0.999697		C1R	-0.484555		ZNF675
CREB3L2	-0.5		GAS6	-0.484555		ZNF254
DUSP19	-0.5		SERPING1	-0.484555		ZNF91
EIF2B2	-0.5		GJA1	-0.457615		ZNF85
EIF2B4	-0.5		TUBB6	-0.457615		CCDC9
ELK1	-0.5		ITGA1	-0.438578		ZNF664
MAPK9	-0.5		ITGA8	-0.438578		ATP5I
MAPKBP1	-0.5		PKD2	-0.438578		COX6B1
NIN	-0.5		LAMA2	-0.438578		COX5B
PARD6A	-0.5		TNNI1	-0.438578		HIST1H3H
BLZF1	-0.499848		GIMAP5	-0.425287		HIST1H2AM
BPNT1	-0.499848		GIMAP6	-0.425287		COG2
PURB	-0.499773		GIMAP2	-0.425287		HIST1H4E
ERGIC3	-0.497803		GIMAP8	-0.425287		GOLGA3
PRKCSH	-0.497803		GIMAP1	-0.283525		ZNF430
ANGEL2	-0.482879		CD2	-0.255172
ZMYM1	-0.482879		GIMAP7	-0.255172
DYNC1LI2	-0.480682		HIST1H2AM	0.304119
DYNLRB1	-0.480682		HIST1H2BH	0.342134
DYNLT1	-0.480682		HIST1H4L	0.399156
OSBPL1A	-0.480682		HIST1H4B	0.399156
PVR	-0.480682		HIST1H2AJ	0.399156
F12	-0.472121		ASCL1	0.403736
PUS3	-0.464242		HES6	0.403736
RPUSD4	-0.464242		COG2	0.405532
CTGF	-0.455303		GOLGA3	0.405532
NOV	-0.455303		ARL13B	0.435704
SPOCK2	-0.455303		IFT172	0.435704
SPRY1	-0.455303		NPHP1	0.435704
EBI3	-0.423182		LSM14B	0.443606
IL27RA	-0.423182		HABP4	0.443606
IL32	-0.423182		MBD6	0.443606
IL33	-0.423182		RPAIN	0.443606
STAT4	-0.423182		ZNF768	0.443606
CAPN3	-0.419848		SMARCAL1	0.443606
DYSF	-0.419848		FOXH1	0.443606
SNTB1	-0.419848		HIST1H3B	0.446839
SPATA18	-0.419848		HIST1H4H	0.446839
SSTR2	-0.406061		HIST1H1B	0.446839
TCF4	-0.406061		CBX5	0.446839
SPARC	-0.364242		HIST1H3F	0.446839
SGCA	-0.335879		HIST1H2AL	0.446839
EIF2AK4	-0.333333		HIST1H2AK	0.446839
VWF	-0.314747		HIST1H3G	0.446839
IL18R1	-0.282121		HIST1H3J	0.446839
IL18RAP	-0.282121		HIST1H3C	0.446839
GSK3B	-0.25		SETD8	0.446839
PURA	-0.249886		HIST1H3H	0.446839
ESAM	-0.236061		H1FNT	0.446839
IGFBP7	-0.227652		TP53BP1	0.446839
PGM5	-0.209924		ARL3	0.449353
EIF2B5	-0.166667		AXIN2	0.449353
COG2	0		ZNF254	0.453305
FAM120A	0		ZNF675	0.453305
GJA4	0		ZNF85	0.453305
GOLGA3	0		ZNF430	0.453305
HIST1H2AM	0		ZNF681	0.453305
HIST1H2BJ	0		ZNF91	0.453305
HIST1H4E	0		DDA1	0.455101
MRPL33	0		WDTC1	0.455101
PHF14	0		YY1	0.456178
PSEN2	0		H3F3B	0.456178
SKIV2L	0		H2AFV	0.456178
STK19	0		H2AFY	0.456178
TBCA	0		HIST1H4D	0.456178
TMEM132A	0		HIST1H4E	0.456178
UBL5	0		HIST1H4F	0.456178
HIST1H2BF	0.0454377		HIST1H4C	0.456178
PARK7	0.0507407		PAK1	0.456178
HIST1H2BD	0.0584199		ING2	0.456178
NDUFC1	0.0608889		SFMBT1	0.456178
COX5B	0.0805882		SMYD2	0.456178
HIST1H2AE	0.0817879		SETMAR	0.456178
COX7A2	0.0830303		SUV420H1	0.456178
NDUFB3	0.0869841		SAP30	0.456178
COX7B	0.0913333		ERBB2	0.469828
HINT1	0.101481		KRT7	0.469828
COX6B2	0.113333		ZBTB41	0.480065
COX6B1	0.114167		PHIP	0.480065
NDUFA4	0.11913		UBN2	0.480065
HIST1H2BG	0.136313		TROVE2	0.480065
HIST1H3H	0.136313		CCDC9	0.49102
NDUFB2	0.145303		ZNF664	0.49102
ATP5I	0.152222		PHRF1	0.494971
MRPS18C	0.152222		UHRF1BP1	0.494971
MRPS33	0.152222		COX5B	0.498204
NDUFB11	0.152222		ATP5G3	0.498204
HIST1H1C	0.153352		NDUFA8	0.498204
NDUFS4	0.161176		UQCRQ	0.498204
HIST1H2BM	0.163576		TXNDC17	0.498204
COX7C	0.168246		ATP5O	0.498204
PFDN1	0.184545		ATP5H	0.498204
NDUFB1	0.195714		COX6B1	0.498204
C20orf24	0.228333		ATP5I	0.498204
NDUFB6	0.228333		MYEOV2	0.498204
NDUFA5	0.243556		MRPS30	0.498204
HEYL	0.244621		MRPS36	0.498204
HIST1H2BI	0.245364		RAD1	0.498204
PFDN6	0.246136		NDUFB5	0.498204
MAML3	0.326162		AIMP1	0.939655
NDUFAB1	0.3425		CCT4	0.939655
NDUFAF1	0.373636
HIST1H2AC	0.408939
HIST1H2BE	0.408939
HIST1H2BN	0.408939
HIST1H2BO	0.408939
HIST2H2BE	0.408939
C7orf26	0.411894
HDGFL1	0.411894
CCDC9	0.439015
ZNF664	0.439015
C14orf2	0.456667
HSD17B8	0.456667
NDUFA12	0.456667
CYP51A1	0.4625
IDI1	0.4625
BICD2	0.469659
NEK7	0.469659
NEK9	0.469659
MAML1	0.489242
NOTCH2	0.489242
RBPJ	0.489242
ATRX	0.492273
PIR	0.492273
RBM3	0.492273
VBP1	0.492273
ZNF644	0.492273
ZNF117	0.497803
ZNF254	0.497803
ZNF430	0.497803
ZNF493	0.497803
ZNF675	0.497803
ZNF85	0.497803
ZNF91	0.497803
ZNF92	0.497803
COX6C	0.548
UQCRB	0.85625
